# Supplementary material
Source: publisher figshare collection journal article supplement (https://gsajournals.figshare.com/ndownloader/files/13519550)
Supplement: Supplementary file 1 [file 13519550]

## Sheet: HopZ1a
Table S1. Confirmed genetic interactors of HopF2
Effector	Genetic Interaction	Systematic Name	Gene Name
HopF2	Suppressor	YAL015C	NTG1
HopF2	Suppressor	YBR145W	ADH5
HopF2	Suppressor	YBL052C	SAS3
HopF2	Suppressor	YBR057C	MUM2
HopF2	Suppressor	YAL064C-A
HopF2	Suppressor	YBR077C	SLM4
HopF2	Suppressor	YBR201W	DER1
HopF2	Suppressor	YBL101C	ECM21
HopF2	Suppressor	YCR073W-A	SOL2
HopF2	Suppressor	YBR270C	BIT2
HopF2	Suppressor	YCR033W	SNT1
HopF2	Suppressor	YCL011C	GBP2
HopF2	Suppressor	YCR043C
HopF2	Suppressor	YDR312W	SSF2
HopF2	Suppressor	YDR179W-A
HopF2	Suppressor	YDR368W	YPR1
HopF2	Suppressor	YDR257C	SET7
HopF2	Suppressor	YDR274C
HopF2	Suppressor	YDR293C	SSD1
HopF2	Suppressor	YDR161W	TCI1
HopF2	Suppressor	YDR439W	LRS4
HopF2	Suppressor	YDR455C
HopF2	Suppressor	YFL021W	GAT1
HopF2	Suppressor	YER034W
HopF2	Suppressor	YGR044C	RME1
HopF2	Suppressor	YGR058W
HopF2	Suppressor	YGL242C
HopF2	Suppressor	YGL256W	ADH4
HopF2	Suppressor	YGR008C	STF2
HopF2	Suppressor	YGR003W	CUL3
HopF2	Suppressor	YGL017W	ATE1
HopF2	Suppressor	YGR146C
HopF2	Suppressor	YHR180W
HopF2	Suppressor	YGR164W
HopF2	Suppressor	YHR185C	PFS1
HopF2	Suppressor	YHL020C	OPI1
HopF2	Suppressor	YHR202W
HopF2	Suppressor	YGR259C
HopF2	Suppressor	YGR260W	TNA1
HopF2	Suppressor	YJL128C	PBS2
HopF2	Suppressor	YJL116C	NCA3
HopF2	Suppressor	YIL146C	ECM37
HopF2	Suppressor	YIL160C	POT1
HopF2	Suppressor	YJL062W	LAS21
HopF2	Suppressor	YJL049W
HopF2	Suppressor	YKL171W
HopF2	Suppressor	YKL207W
HopF2	Suppressor	YKL206C
HopF2	Suppressor	YKL009W	MRT4
HopF2	Suppressor	YKL041W	VPS24
HopF2	Suppressor	YLL032C
HopF2	Suppressor	YKL160W	ELF1
HopF2	Suppressor	YLR206W	ENT2
HopF2	Suppressor	YLR023C	IZH3
HopF2	Suppressor	YLR028C	ADE16
HopF2	Suppressor	YLR280C
HopF2	Suppressor	YLR278C
HopF2	Suppressor	YLR269C
HopF2	Suppressor	YLR149C
HopF2	Suppressor	YLR392C
HopF2	Suppressor	YLR406C	RPL31B
HopF2	Suppressor	YLR401C	DUS3
HopF2	Suppressor	YLR423C	ATG17
HopF2	Suppressor	YML116W	ATR1
HopF2	Suppressor	YML010C-B
HopF2	Suppressor	YMR011W	HXT2
HopF2	Suppressor	YMR136W	GAT2
HopF2	Suppressor	YMR230W	RPS10B
HopF2	Suppressor	YMR226C
HopF2	Suppressor	YMR022W	QRI8
HopF2	Suppressor	YNL183C	NPR1
HopF2	Suppressor	YNL057W
HopF2	Suppressor	YNL056W
HopF2	Suppressor	YNL309W	STB1
HopF2	Suppressor	YMR307W	GAS1
HopF2	Suppressor	YNL099C	OCA1
HopF2	Suppressor	YNR007C	ATG3
HopF2	Suppressor	YNR006W	VPS27
HopF2	Suppressor	YNL234W
HopF2	Suppressor	YOR069W	VPS5
HopF2	Suppressor	YOL025W	LAG2
HopF2	Suppressor	YOL116W	MSN1
HopF2	Suppressor	YOR321W	PMT3
HopF2	Suppressor	YOR209C	NPT1
HopF2	Suppressor	YPL067C
HopF2	Suppressor	YOR357C	GRD19
HopF2	Suppressor	YPL105C
HopF2	Suppressor	YPL115C	BEM3
HopF2	Suppressor	YPL008W	CHL1
HopF2	Suppressor	YOR276W	CAF20
HopF2	Suppressor	YPL227C	ALG5
HopF2	Suppressor	YPL123C	RNY1
HopF2	Suppressor	YPL250C	ICY2
HopF2	Suppressor	YBR078W	ECM33
HopF2	Suppressor	YFL010C	WWM1
HopF2	Suppressor	YFL003C	MSH4
HopF2	Suppressor	YGR055W	MUP1
HopF2	Suppressor	YDR046C	BAP3
HopF2	Suppressor	YPR089W
HopF2	Suppressor	YBR181C	RPS6B
HopF2	Suppressor	YBR068C	BAP2
HopF2	Suppressor	YLL048C	YBT1
HopF2	Suppressor	YNL294C	RIM21
HopF2	Suppressor	YNL198C
HopF2	Suppressor	YFL013C	IES1
HopF2	Synthetic lethal	YBR131W	CCZ1
HopF2	Synthetic lethal	YAL002W	VPS8
HopF2	Synthetic lethal	YBR175W	SWD3
HopF2	Synthetic lethal	YDR159W	SAC3
HopF2	Synthetic lethal	YEL062W	NPR2
HopF2	Synthetic lethal	YJL204C	RCY1
HopF2	Synthetic lethal	YIL090W	ICE2
HopF2	Synthetic lethal	YJL046W
HopF2	Synthetic lethal	YKL137W
HopF2	Synthetic lethal	YLR262C	YPT6
HopF2	Synthetic lethal	YLR261C
HopF2	Synthetic lethal	YLR038C	COX12
HopF2	Synthetic lethal	YLR425W	TUS1
HopF2	Synthetic lethal	YMR202W	ERG2
HopF2	Synthetic lethal	YMR105C	PGM2
HopF2	Synthetic lethal	YMR016C	SOK2
HopF2	Synthetic lethal	YNL274C
HopF2	Synthetic lethal	YNL265C	IST1
HopF2	Synthetic lethal	YPR173C	VPS4
HopF2	Synthetic lethal	YNL300W	TOS6
